# Supplementary material for: A Complex Genomic Rearrangement Involving the Endothelin 3 Locus Causes Dermal Hyperpigmentation in the Chicken
Source: PubMed Central journal article supplement (PMC3245302; doi:10.1371/journal.pgen.1002412), 2011-12-22

**Figure S2. Agarose gel image of FM PCR diagnostic test products.**

Results of the PCR diagnostic test for both duplication junction points (assay A and B). All three genotypic classes are shown (\*FM/ \*FM, \*FM/ \*N and \*N/ \*N), although the results of the heterozygote are identical to the homozygous mutant due to the retention of all wild-type sequences within the duplicated and inverted structure of the mutant allele.

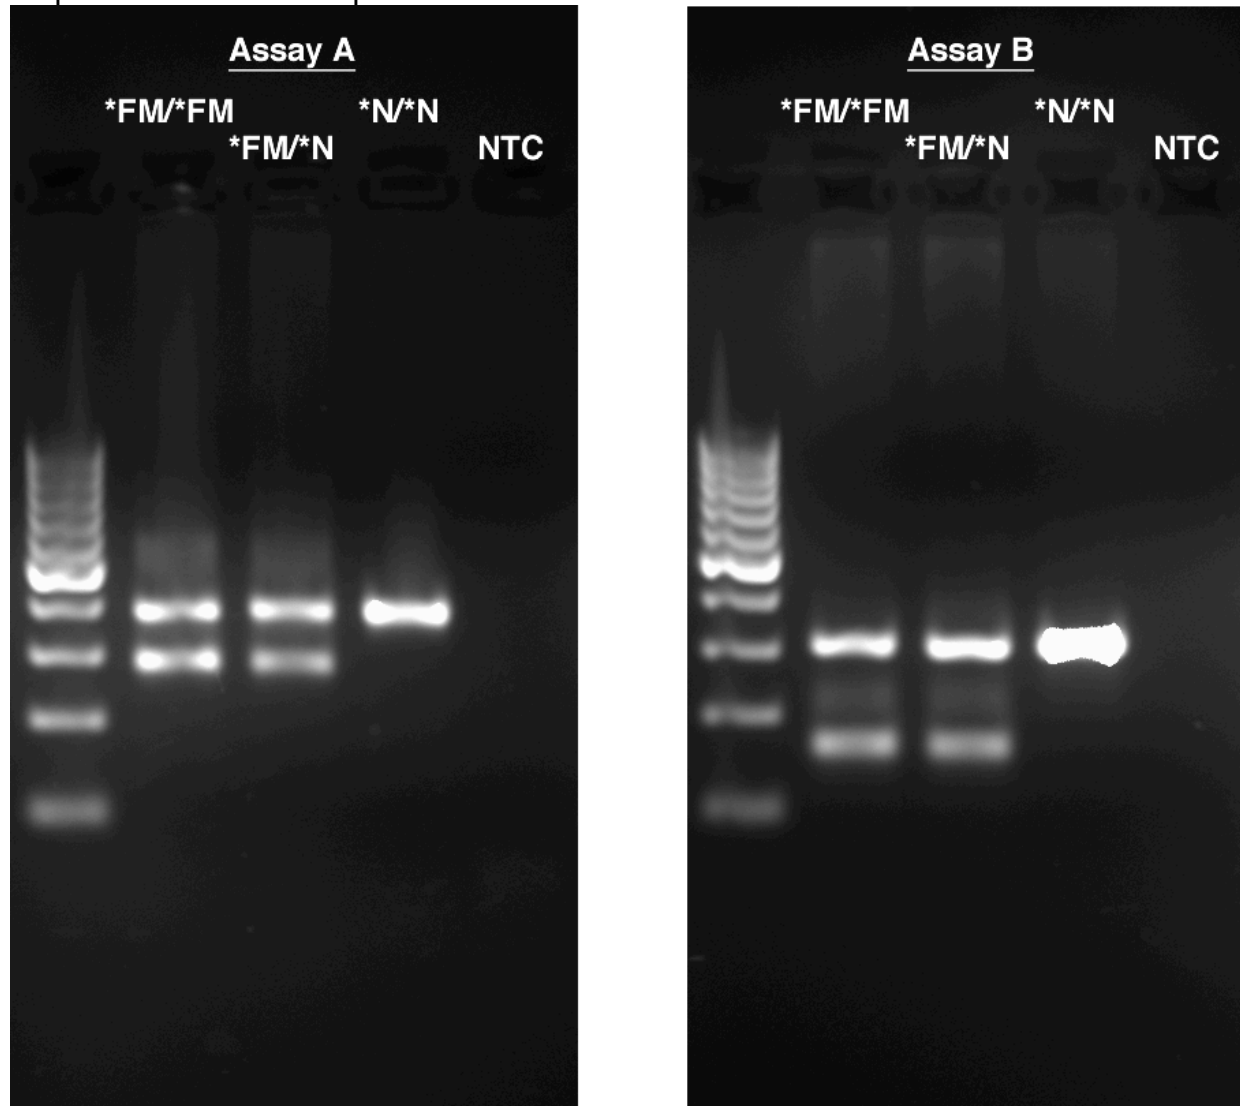

Supplement: pgen.1002412.s002.pdf [file pgen.1002412.s002.pdf]
