# Supplementary material for: A Complex Genomic Rearrangement Involving the Endothelin 3 Locus Causes Dermal Hyperpigmentation in the Chicken
Source: PubMed Central journal article supplement (PMC3245302; doi:10.1371/journal.pgen.1002412), 2011-12-22

**Figure S3. Gene expression in FM adult skin and muscle tissue.**

Across breed and tissue gene expression analysis by SYBR Green qPCR of \*FM (Silkie breed) tissue and \*N (New Hampshire breed) calibrated to glyceraldehyde 3-phosphate dehydrogenase (*GAPDH*). Error bars indicate 95% confidence intervals and sample groups with significant ( $P < 0.05$ ) differences in expression level are indicated by different superscripts. The data table below the graph shows the numerical value of the plotted values.

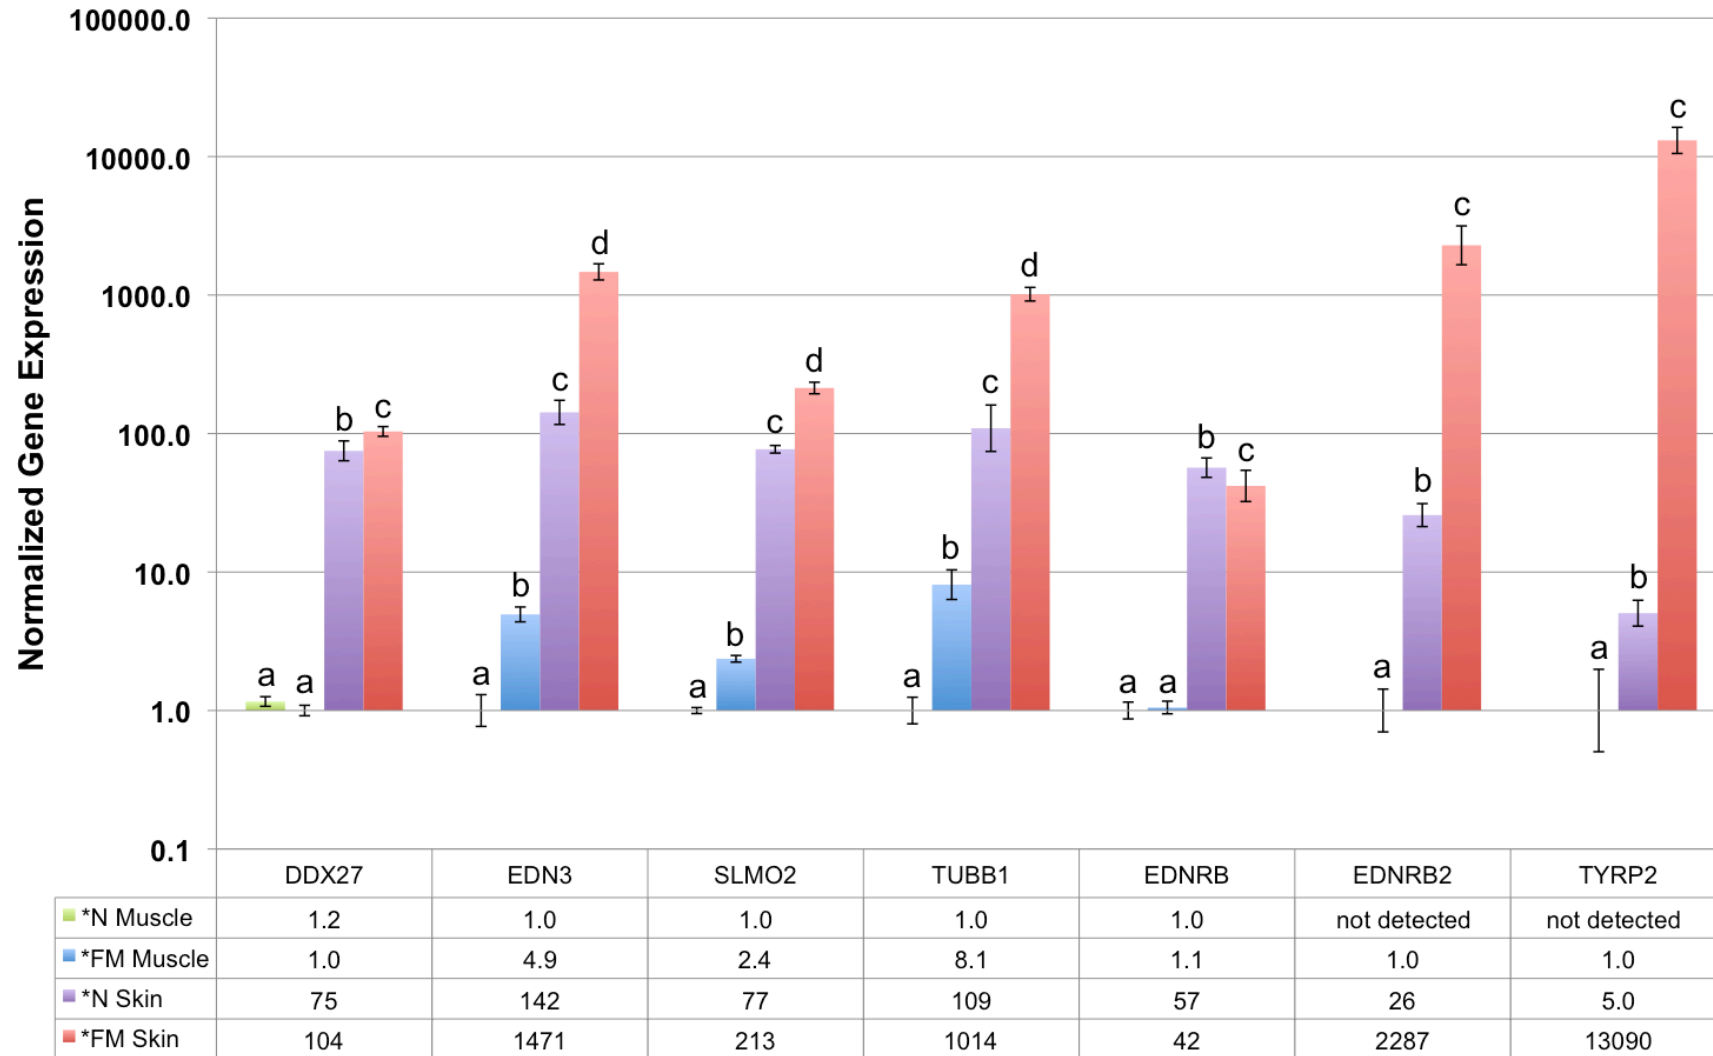

Supplement: pgen.1002412.s003.pdf [file pgen.1002412.s003.pdf]
