# Supplementary material for: A Complex Genomic Rearrangement Involving the Endothelin 3 Locus Causes Dermal Hyperpigmentation in the Chicken
Source: PubMed Central journal article supplement (PMC3245302; doi:10.1371/journal.pgen.1002412), 2011-12-22
Supplement: pgen.1002412.s008.pdf [file pgen.1002412.s008.pdf]

**Table S5. Lack of sequence variation at the 5' junction of Duplication 1 and Duplication 2 in FM chickens.**

The base pair coordinates across the top row are relative to the breakpoint at position 0. The first individual, G7, is used as the reference sequence. A "." indicates the same allele as the reference and empty cells are missing data. Four different populations of Silkie chickens are shown, with each bird verified to be homozygous for the duplication associated with FM by genomic qPCR.

| Sample ID | Breed    | -360 | 420 |
|-----------|----------|------|-----|
| G7        | Silkie-A | A    | A   |
| G8        | Silkie-A | .    | .   |
| G9        | Silkie-A | .    | .   |
| G10       | Silkie-A | .    | .   |
| 1746      | Silkie-B | .    | .   |
| 1747      | Silkie-B | .    | .   |
| 1748      | Silkie-B | .    | .   |
| 417       | Silkie-C | .    | .   |
| 434       | Silkie-C | .    | .   |
| 438       | Silkie-C | .    | .   |
| 1         | Silkie-D | .    | .   |
| 5         | Silkie-D | .    | .   |
| 7         | Silkie-D | .    | .   |
