# Supplementary material for: A Complex Genomic Rearrangement Involving the Endothelin 3 Locus Causes Dermal Hyperpigmentation in the Chicken
Source: PubMed Central journal article supplement (PMC3245302; doi:10.1371/journal.pgen.1002412), 2011-12-22
Supplement: pgen.1002412.s010.pdf [file pgen.1002412.s010.pdf]

**Table S7. Primer sequences for genomic DNA PCR assays.**

| ID  | Name    | Purpose                 | Orientation  | Chr. | Position (bp) | Primer Sequence        |
|-----|---------|-------------------------|--------------|------|---------------|------------------------|
| 4   |         | Genomic qPCR            | F            | 1    | 68,335,770    | CCGTCATCCAGAGCACTTAC   |
| 5   |         | Genomic qPCR            | TaqMan Probe | 1    | 68,335,794    | TCAAAGGCGAGGAGCCCC     |
| 6   |         | Genomic qPCR            | R            | 1    | 68,335,886    | GGTCATCCTCTTCCTCATCATA |
| 236 |         | Breakpoint Sequencing   | F            | 20   | 10,716,685    | AGACCGGCTTCAAGAATGTCTC |
| 232 |         | Diagnostic Test Assay A | F            | 20   | 10,717,082    | AGAAACAAGGGTCAAGGTGAGC |
|     |         | BREAKPOINT              |              | 20   | 10,717,294    |                        |
| 234 |         | Diagnostic Test Assay A | R            | 20   | 10,717,460    | TGGATCATTGGAGGAAGTGTTG |
| 196 | Dup1_5' | Breakpoint Sequencing   | R            | 20   | 10,717,500    | GGAAGCCTACAATCTCCAGCAT |
| 237 |         | Breakpoint Sequencing   | R            | 20   | 10,717,721    | ACACTCCACATGTCCCTCTGAA |
| 1   |         | Genomic qPCR            | F            | 20   | 10,748,149    | GGCAGGAATTGAACCTCATT   |
| 2   |         | Genomic qPCR            | TaqMan Probe | 20   | 10,748,207    | CAGCACGGGTGCTCAGC      |
| 3   |         | Genomic qPCR            | R            | 20   | 10,748,254    | TTGTTTGCCTCCAAAGCTC    |
| 238 |         | Breakpoint Sequencing   | F            | 20   | 10,845,625    | CAATGCAGGAGCAGATAACCAC |
| 152 | Dup1_3' | Breakpoint Sequencing   | F            | 20   | 10,845,625    | CAATGCAGGAGCAGATAACCAC |
| 197 |         | Diagnostic Test Assay B | F            | 20   | 10,846,172    | GCAGCCTTTATTATTGCGTGTG |
|     |         | BREAKPOINT              |              | 20   | 10,846,232    |                        |
| 239 |         | Breakpoint Sequencing   | R            | 20   | 10,846,681    | CAACCAACCCAGTAACCACAAG |
| 240 |         | Breakpoint Sequencing   | F            | 20   | 11,262,328    | TGTGTGGCTCAGCTTTGTATCA |
|     |         | BREAKPOINT              |              | 20   | 11,262,904    |                        |
| 200 | Dup2_5' | Diagnostic Test Assay A | R            | 20   | 11,263,016    | GGGATGGCTCTCACATAAAAGG |
| 241 |         | Breakpoint Sequencing   | R            | 20   | 11,263,388    | CCCAATGTAGCAGCACACTTCT |
| 35  |         | Genomic qPCR            | F            | 20   | 11,398,002    | ACACCGGGTTTCTGTATGT    |
| 36  |         | Genomic qPCR            | TaqMan Probe | 20   | 11,398,077    | TCCGAGGTTATTCCCAGATGGG |
| 37  |         | Genomic qPCR            | R            | 20   | 11,398,118    | CAGACAGGCCTCGACAGATA   |
| 242 |         | Breakpoint Sequencing   | F            | 20   | 11,434,817    | CAGGTCCTGTTTTCCAAACCTC |
| 201 |         | Diagnostic Test Assay B | F            | 20   | 11,435,158    | CTTGGCTCAGATATTCGCCTCT |
| 153 | Dup2_5' | Breakpoint Sequencing   | F            | 20   | 11,435,158    | CTTGGCTCAGATATTCGCCTCT |
|     |         | BREAKPOINT              |              | 20   | 11,435,256    |                        |
| 202 |         | Diagnostic Test Assay B | R            | 20   | 11,435,459    | AGGCACAGTCTGGCACATTTAA |
| 243 |         | Breakpoint Sequencing   | R            | 20   | 11,435,822    | GAACAAACCCATGCCATTTTCT |
