# Supplementary material for: A Complex Genomic Rearrangement Involving the Endothelin 3 Locus Causes Dermal Hyperpigmentation in the Chicken
Source: PubMed Central journal article supplement (PMC3245302; doi:10.1371/journal.pgen.1002412), 2011-12-22
Supplement: pgen.1002412.s011.pdf [file pgen.1002412.s011.pdf]

**Table S8. Primer sequences for cDNA qPCR assays.**

| <b>ID</b> | <b>Gene</b> | <b>GenBank ID</b> | <b>Orientation</b> | <b>Chr.</b> | <b>Position (bp)</b> | <b>Product Size (bp)</b> | <b>Primer Sequence</b>  |
|-----------|-------------|-------------------|--------------------|-------------|----------------------|--------------------------|-------------------------|
| 304       | GAPDH       | NM_204305         | F                  | 1           |                      | 108                      | GGTGAAAGTCGGAGTCAACGG   |
| 305       | GAPDH       | NM_204305         | R                  | 1           |                      | 108                      | TCGATGAAGGGATCATTGATGGC |
| 308       | EDNRB       | NM_001001127      | F                  | 1           | 158,008,082          | 140                      | CACCCACACAGAAAACATC     |
| 309       | EDNRB       | NM_001001127      | R                  | 1           | 158,008,545          | 140                      | TTCTTTTCGTAACATCTCACAGG |
| 310       | EDNRB2      | NM_204120         | F                  | 4           | 11,262,828           | 189                      | ACCGTCTTCTGCCTCGTG      |
| 311       | EDNRB2      | NM_204120         | R                  | 4           | 11,263,325           | 189                      | GAGAGCCACAGGATTGATGC    |
| 316       | TYRP2       | NM_204935         | F                  | 1           | 150,689,148          | 154                      | CCTCAAGTTCTTCAACCAGAG   |
| 317       | TYRP2       | NM_204935         | R                  | 1           | 150,697,447          | 154                      | CCTCTCCTCCACTGTCAAG     |
| 318       | DDX27       | NM_001006293      | F                  | 20          | 10,704,938           | 117                      | TTGAGGATCGGAAACGCTTG    |
| 319       | DDX27       | NM_001006293      | R                  | 20          | 10,704,564           | 117                      | GATAGCCACATTCCCCACT     |
| 320       | TUBB1       | NM_205445         | F                  | 20          | 10,844,351           | 127                      | CTTCAGATTGGCCAGTGTGG    |
| 321       | TUBB1       | NM_205445         | R                  | 20          | 10,842,599           | 127                      | CGTTAATTCGCTCAAGCTGC    |
| 322       | SLMO2       | NM_001030866      | F                  | 20          | 10,826,184           | 164                      | GGCTCGTCTATAAACCACACC   |
| 323       | SLMO2       | NM_001030866      | R                  | 20          | 10,827,722           | 164                      | TACCCATTCCAATGCTTCACG   |
| 324       | EDN3        | XM_001231487      | F                  | 20          | 10,765,765           | 97                       | CATCTGGATCAACACCCCAG    |
| 325       | EDN3        | XM_001231487      | R                  | 20          | 10,753,923           | 97                       | ACTTTGATTCTGGCCCGTAG    |
